# Supplementary material for: Introducing graupel density prediction in Weather Research and Forecasting (WRF) double-moment 6-class (WDM6) microphysics and evaluation of the modified scheme during the ICE-POP field campaign
Source: Copernicus journal article supplement (doi:10.5194/gmd-17-7199-2024), 2024-09-27
Supplement: Supplementary file 1 [file gmd-17-7199-2024-supplement.pdf]

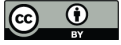

*Supplement of*

**Introducing graupel density prediction in Weather Research and Forecasting (WRF) double-moment 6-class (WDM6) microphysics and evaluation of the modified scheme during the ICE-POP field campaign**

**Sun-Young Park et al.**

*Correspondence to:* Kyo-Sun Sunny Lim ([kyosunlim@knu.ac.kr](mailto:kyosunlim@knu.ac.kr))

The copyright of individual parts of the supplement might differ from the article licence.

## Supplementary material:

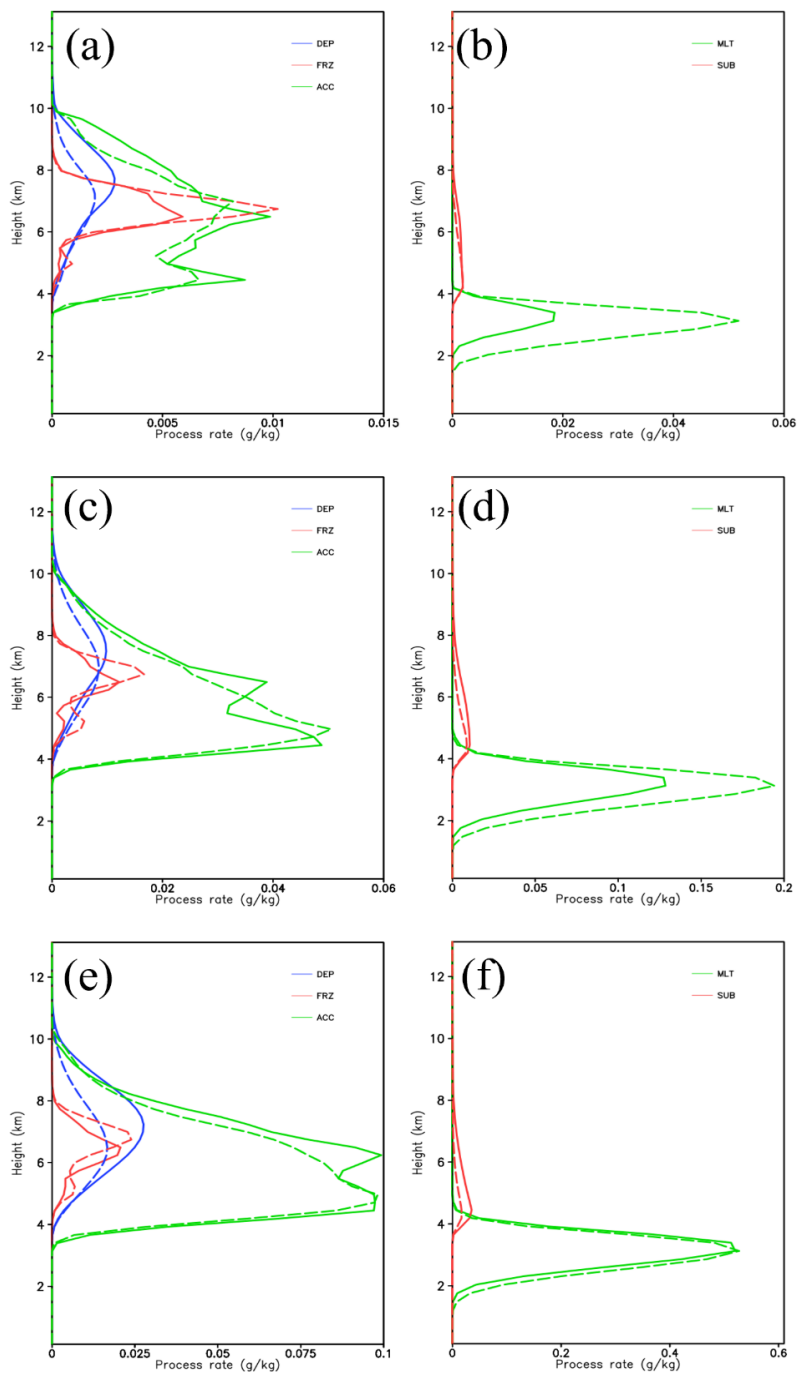

5 **Figure S1: Vertical profiles for the domain-averaged (a) sources and (b) sinks of graupel mass mixing ratio in WDM6\_FD (Solid line) and WDM6\_PD (dashed line) at 1 hour (a and b), 2 hour (c and d), and 4 hour (e and f). The main source processes, namely, deposition (Pgdep; DEP), accretion (mean of Paacw, Psacr and Pgr; ACC) and freezing (Pgrz; FRZ) are plotted with the major sink processes, namely, sublimation (Pgsub; SUB) and melting (Pgmlt; MLT).**

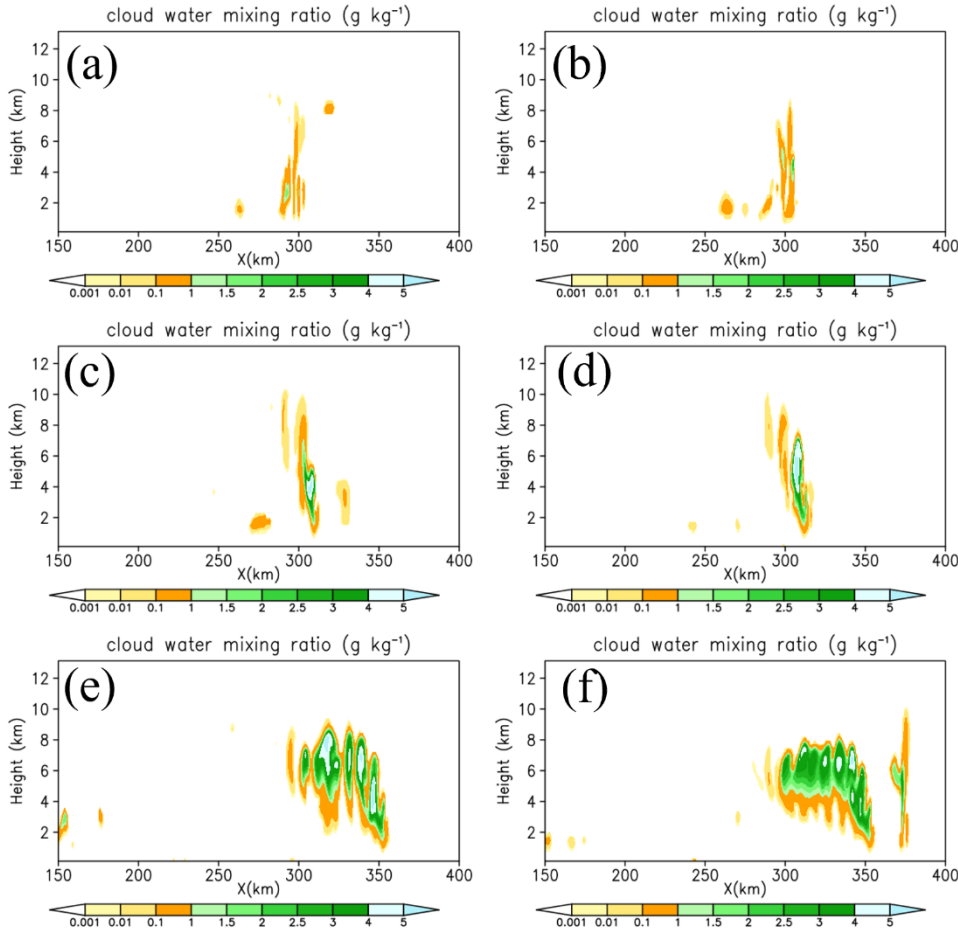

10 **Figure S2: Spatial distribution of cloud water mass mixing ratio (g kg<sup>-1</sup>) in WDM6\_FD (a, c, and e) and WDM6\_PD (b, d, and f) at 1 hour (a and b), 2 hour (c and d), and 4 hour (e and f).**

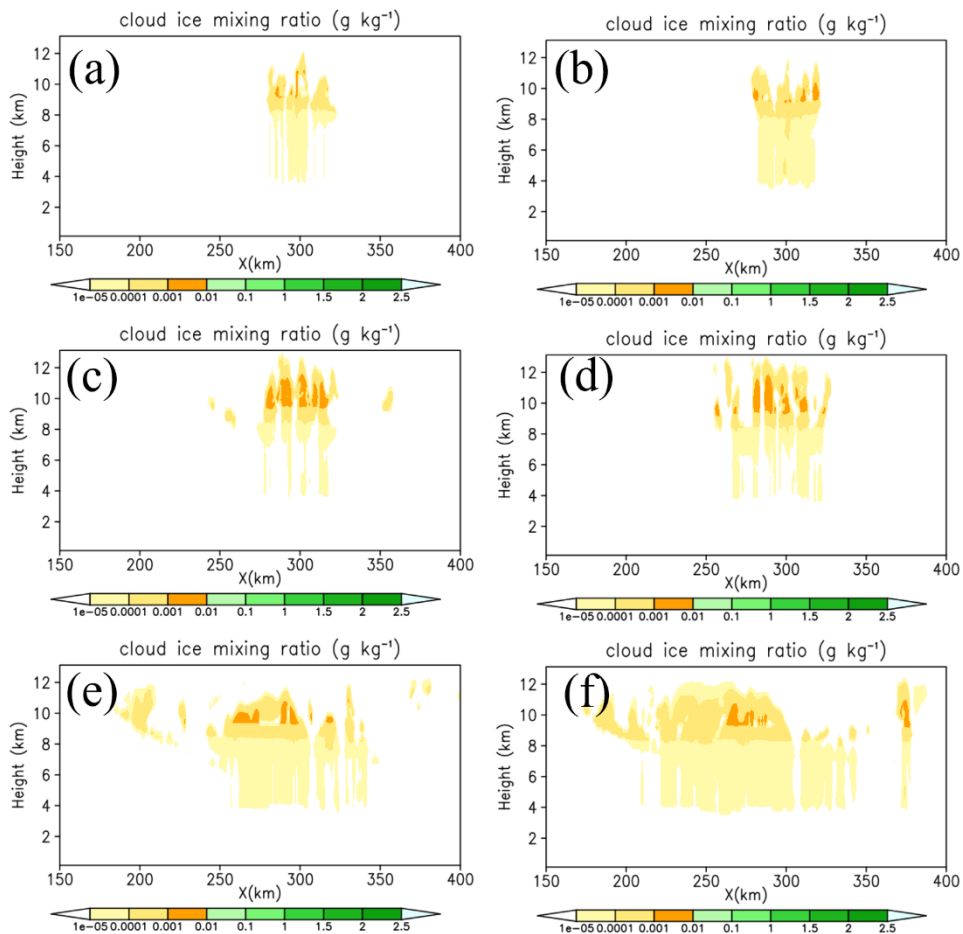

**Figure S3: Same as Figure 2, but for cloud ice.**

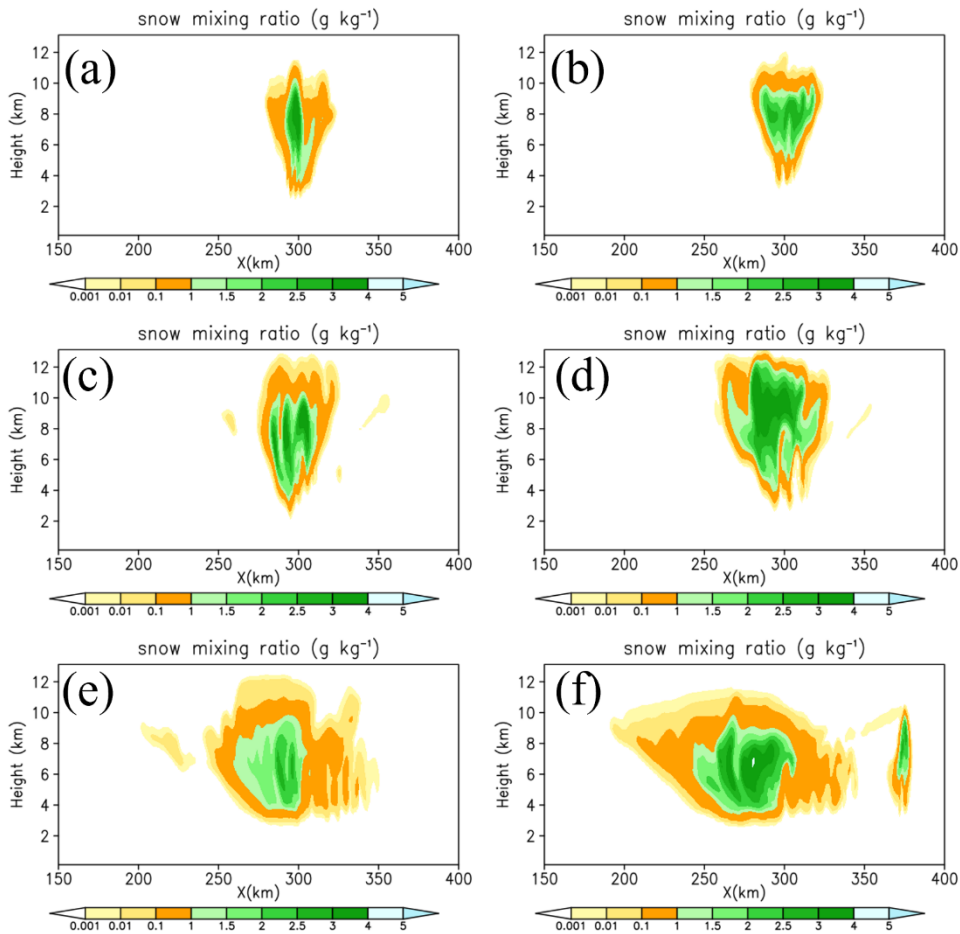

15

**Figure S4: Same as Figure 2, but for snow.**

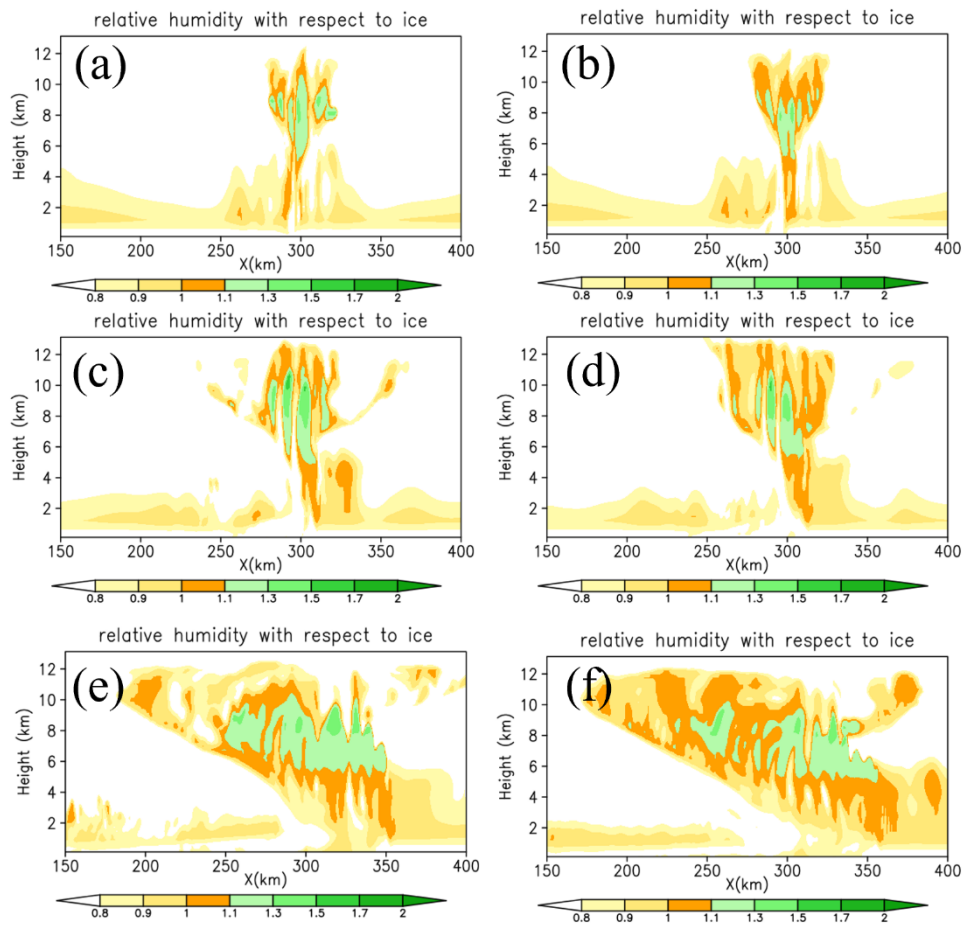

**Figure S5: Same as Figure 2, but for relative humidity with respect to ice.**

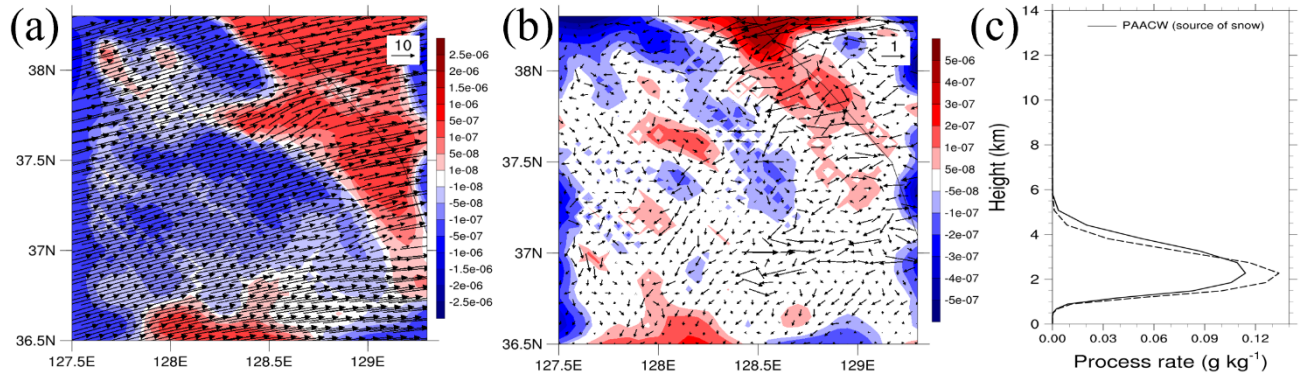

**Figure S6: Snow advection ( $\text{g kg}^{-1} \text{s}^{-1}$ ) and wind vector ( $\text{m s}^{-1}$ ) at 850hPa for CL case from (a) WDM6\_FD, and (b) the difference between WDM6\_PD and WDM6\_FD (WDM6\_PD minus WDM6\_FD). The vertical profiles of the time-domain-averaged Paacw process for C1 case are shown in (c). The solid (dashed) line represents WDM6\_FD (WDM6\_PD).**
